# Supplementary material
Source: PubMed Central journal article supplement (PMC4209192)
Supplement: NIHMS625452-supplement-304437DR3_Acknowledgment.pdf [file NIHMS625452-supplement-304437DR3_Acknowledgment.pdf]

## Circulation Research

---

**From:** Sara Karwacki <skarwacki@comcast.net>  
**Sent:** Friday, August 29, 2014 1:59 PM  
**To:** circulation.research@circresearch.com  
**Subject:** Acknowledgment - CIRCRES/2014/304437DR2

To Whom It May Concern:

I give my permission to be acknowledged in the paper "Moderate hypoxia potentiates interleukin-1 beta production in activated human macrophages", CIRCRES/2014/304437DR2, by Folco et al.

Sincerely,  
Sara Karwacki

## Circulation Research

---

**From:** Swallow, Chelsea <CSWALLOW@PARTNERS.ORG>  
**Sent:** Tuesday, September 02, 2014 8:48 AM  
**To:** circulation.research@circresearch.com  
**Subject:** Acknowledgment Permission

Hello,

I wanted to let you know that I give my permission to be acknowledged in the paper "Moderate hypoxia potentiates interleukin-1 beta production in activated human macrophages", CIRCRES/2014/304437DR2, by Folco et al.

Please let me know if you need any further info from me.

Best,  
Chelsea Swallow  
Editorial Associate to Dr. Peter Libby  
Brigham and Women's Hospital | Harvard Medical School  
New Research Building  
77 Avenue Louis Pasteur, NRB 7  
Boston, MA 02115  
P: 617-525-4383

The information in this e-mail is intended only for the person to whom it is addressed. If you believe this e-mail was sent to you in error and the e-mail contains patient information, please contact the Partners Compliance HelpLine at <http://www.partners.org/complianceline> . If the e-mail was sent to you in error but does not contain patient information, please contact the sender and properly dispose of the e-mail.

## Circulation Research

---

**From:** Maganto-Garcia, Elena <Elena.Maganto-Garcia@pfizer.com>  
**Sent:** Tuesday, September 02, 2014 8:33 AM  
**To:** circulation.research@circresearch.com  
**Subject:** Permission to be acknowledge CIRCRES/2014/304437DR2, by Folco et al.

To whom it may concern,

I give my permission to be acknowledged in the paper “Moderate hypoxia potentiates interleukin-1 beta production in activated human macrophages”, CIRCRES/2014/304437DR2, by Folco et al.

Best Regards,

Elena

## Circulation Research

---

**From:** Belanger, Marc F. <MBELANGER3@PARTNERS.ORG>  
**Sent:** Monday, September 01, 2014 11:35 AM  
**To:** 'circulation.research@circresearch.com'  
**Cc:** Folco, Eduardo Julio,Ph.D.  
**Subject:** Acknowledgments-Circ. Research

Good Morning,

I give my permission to be acknowledged in the paper "Moderate hypoxia potentiates interleukin-1 beta production in activated human macrophages", CIRCRES/2014/304437DR2, by Folco et al.

Thank you

marc

Marc Belanger  
Department of Cardiovascular Medicine  
Brigham and Women's Hospital  
Harvard Medical School  
77 Avenue Louis Pasteur  
NRB-7 Room 741G  
Boston, MA 02115

mbelanger3@partners.org  
(617)525-4356 Telephone  
(617)525-4400 Fax

The information in this e-mail is intended only for the person to whom it is addressed. If you believe this e-mail was sent to you in error and the e-mail contains patient information, please contact the Partners Compliance HelpLine at <http://www.partners.org/complianceline> . If the e-mail was sent to you in error but does not contain patient information, please contact the sender and properly dispose of the e-mail.

## Circulation Research

---

**From:** Shvartz, Eugenia <eshvartz@rics.bwh.harvard.edu>  
**Sent:** Tuesday, September 02, 2014 10:30 AM  
**To:** circulation.research@circresearch.com  
**Subject:** acknowledged in the paper "Moderate hypoxia potentiates interleukin-1 beta

I give my permission to be acknowledged in the paper "Moderate hypoxia potentiates interleukin-1 beta production in activated human macrophages", CIRCRES/2014/304437DR2, by Folco et al.

Thank you. Eugenia Shvartz

The information in this e-mail is intended only for the person to whom it is addressed. If you believe this e-mail was sent to you in error and the e-mail contains patient information, please contact the Partners Compliance HelpLine at <http://www.partners.org/complianceline> . If the e-mail was sent to you in error but does not contain patient information, please contact the sender and properly dispose of the e-mail.
